# Supplementary material for: Metagenomics Indicates an Interplay of the Microbiome and Functional Pathways in Parkinson's Disease
Source: Research Square preprint supplement (doi:10.21203/rs.3.rs-7209227/v1), 2025-08-05
Supplement: Supplementary file 1 [file 43a5a3b982bc8a43df4e6b0e.docx]

**Supplementary Material**

**Table S1.** A table illustrating the MetaCyc Pathways terms that were significantly more abundant in patients with Parkinson’s disease or healthy controls, identified using Wilcoxon Test.

| **Name** | **Mean** | **Greater** |
| --- | --- | --- |
| adenosine ribonucleotides de novo biosynthesis | 3.00E-02 | Healthy |
| S-adenosyl-L-methionine cycle I | 1.97E-02 | Healthy |
| coenzyme A biosynthesis II (mammalian) | 1.91E-02 | Healthy |
| starch degradation V | 1.65E-02 | PD |
| UMP biosynthesis | 1.51E-02 | PD |
| chorismate biosynthesis from 3-dehydroquinate | 1.46E-02 | Healthy |
| guanosine ribonucleotides de novo biosynthesis | 1.39E-02 | PD |
| UDP-N-acetylmuramoyl-pentapeptide biosynthesis II (lysine-containing) | 1.38E-02 | PD |
| CDP-diacylglycerol biosynthesis II | 1.37E-02 | Healthy |
| CDP-diacylglycerol biosynthesis I | 1.37E-02 | Healthy |
| chorismate biosynthesis I | 1.34E-02 | PD |
| superpathway of adenosine nucleotides de novo biosynthesis I | 1.33E-02 | PD |
| superpathway of aromatic amino acid biosynthesis | 1.31E-02 | Healthy |
| UDP-N-acetylmuramoyl-pentapeptide biosynthesis I (meso-diaminopimelate containing) | 1.30E-02 | PD |
| peptidoglycan biosynthesis I (meso-diaminopimelate containing) | 1.26E-02 | PD |
| 5-aminoimidazole ribonucleotide biosynthesis I | 1.23E-02 | PD |
| glycolysis IV (plant cytosol) | 1.22E-02 | PD |
| L-lysine biosynthesis VI | 1.22E-02 | PD |
| pyruvate fermentation to isobutanol (engineered) | 1.21E-02 | PD |
| methylerythritol phosphate pathway I | 1.20E-02 | PD |
| superpathway of adenosine nucleotides de novo biosynthesis II | 1.18E-02 | PD |
| 5-aminoimidazole ribonucleotide biosynthesis II | 1.18E-02 | PD |
| superpathway of 5-aminoimidazole ribonucleotide biosynthesis | 1.18E-02 | PD |
| L-isoleucine biosynthesis I (from threonine) | 1.17E-02 | PD |
| L-valine biosynthesis | 1.17E-02 | PD |
| Calvin-Benson-Bassham cycle | 1.17E-02 | PD |
| pentose phosphate pathway (non-oxidative branch) | 1.10E-02 | Healthy |
| preQ0 biosynthesis | 1.05E-02 | Healthy |
| L-lysine biosynthesis III | 1.05E-02 | PD |
| glycolysis III (from glucose) | 1.04E-02 | Healthy |
| queuosine biosynthesis | 9.98E-03 | Healthy |
| phosphopantothenate biosynthesis I | 9.86E-03 | Healthy |
| adenosine deoxyribonucleotides de novo biosynthesis II | 9.49E-03 | Healthy |
| guanosine deoxyribonucleotides de novo biosynthesis II | 9.49E-03 | Healthy |
| peptidoglycan biosynthesis III (mycobacteria) | 9.20E-03 | PD |
| dTDP-L-rhamnose biosynthesis I | 9.18E-03 | Healthy |
| tRNA charging | 8.78E-03 | PD |
| urate biosynthesis/inosine 5'-phosphate degradation | 8.66E-03 | PD |
| purine ribonucleosides degradation | 8.64E-03 | PD |
| superpathway of L-lysine, L-threonine and L-methionine biosynthesis II | 8.31E-03 | PD |
| thiamin formation from pyrithiamine and oxythiamine (yeast) | 7.99E-03 | Healthy |
| superpathway of pyrimidine nucleobases salvage | 7.87E-03 | Healthy |
| L-histidine biosynthesis | 7.86E-03 | Healthy |
| superpathway of pyrimidine deoxyribonucleotides de novo biosynthesis (E. coli) | 7.75E-03 | Healthy |
| superpathway of branched amino acid biosynthesis | 7.64E-03 | PD |
| superpathway of guanosine nucleotides de novo biosynthesis I | 7.60E-03 | Healthy |
| L-isoleucine biosynthesis III | 7.12E-03 | PD |
| superpathway of S-adenosyl-L-methionine biosynthesis | 7.12E-03 | Healthy |
| superpathway of guanosine nucleotides de novo biosynthesis II | 6.68E-03 | Healthy |
| N10-formyl-tetrahydrofolate biosynthesis | 6.67E-03 | Healthy |
| pyrimidine deoxyribonucleotides de novo biosynthesis I | 6.61E-03 | Healthy |
| L-homoserine and L-methionine biosynthesis | 6.56E-03 | Healthy |
| folate transformations II | 6.52E-03 | Healthy |
| glycolysis I (from glucose 6-phosphate) | 6.35E-03 | Healthy |
| homolactic fermentation | 6.22E-03 | Healthy |
| adenine and adenosine salvage III | 6.20E-03 | Healthy |
| cis-vaccenate biosynthesis | 6.08E-03 | Healthy |
| superpathway of L-isoleucine biosynthesis I | 6.06E-03 | PD |
| pyrimidine deoxyribonucleotides de novo biosynthesis II | 5.92E-03 | Healthy |
| gondoate biosynthesis (anaerobic) | 5.85E-03 | Healthy |
| D-galactose degradation V (Leloir pathway) | 5.77E-03 | PD |
| galactose degradation I (Leloir pathway) | 5.76E-03 | PD |
| glycolysis II (from fructose 6-phosphate) | 5.74E-03 | Healthy |
| superpathway of L-threonine biosynthesis | 5.70E-03 | PD |
| superpathway of L-methionine biosynthesis (transsulfuration) | 5.69E-03 | Healthy |
| glycolysis VI (metazoan) | 5.67E-03 | Healthy |
| L-arginine biosynthesis IV (archaebacteria) | 5.35E-03 | Healthy |
| superpathway of pyrimidine ribonucleotides de novo biosynthesis | 5.33E-03 | Healthy |
| superpathway of purine nucleotides de novo biosynthesis I | 5.30E-03 | PD |
| flavin biosynthesis III (fungi) | 5.27E-03 | Healthy |
| peptidoglycan maturation (meso-diaminopimelate containing) | 5.23E-03 | Healthy |
| thiamin salvage II | 5.19E-03 | Healthy |
| superpathway of purine nucleotides de novo biosynthesis II | 5.15E-03 | PD |
| pyrimidine deoxyribonucleotides de novo biosynthesis III | 5.13E-03 | Healthy |
| pantothenate and coenzyme A biosynthesis I | 5.13E-03 | PD |
| pyrimidine deoxyribonucleosides salvage | 5.09E-03 | Healthy |
| L-arginine biosynthesis I (via L-ornithine) | 5.03E-03 | Healthy |
| pyrimidine deoxyribonucleotide phosphorylation | 5.02E-03 | Healthy |
| stachyose degradation | 5.00E-03 | PD |
| L-tryptophan biosynthesis | 4.90E-03 | Healthy |
| L-methionine biosynthesis I | 4.75E-03 | Healthy |
| pyruvate fermentation to acetate and lactate II | 4.62E-03 | PD |
| 4-amino-2-methyl-5-phosphomethylpyrimidine biosynthesis (yeast) | 4.46E-03 | Healthy |
| superpathway of pyrimidine ribonucleosides salvage | 4.44E-03 | Healthy |
| inosine-5'-phosphate biosynthesis I | 4.30E-03 | PD |
| superpathway of pyridoxal 5'-phosphate biosynthesis and salvage | 4.10E-03 | Healthy |
| NAD biosynthesis I (from aspartate) | 4.05E-03 | PD |
| adenosylcobalamin salvage from cobinamide I | 3.86E-03 | Healthy |
| tetrapyrrole biosynthesis I (from glutamate) | 3.77E-03 | PD |
| coenzyme A biosynthesis I | 3.66E-03 | PD |
| inosine-5'-phosphate biosynthesis II | 3.65E-03 | PD |
| superpathway of thiamin diphosphate biosynthesis III (eukaryotes) | 3.64E-03 | Healthy |
| superpathway of pyrimidine deoxyribonucleotides de novo biosynthesis | 3.60E-03 | Healthy |
| sucrose degradation III (sucrose invertase) | 3.48E-03 | PD |
| glycogen biosynthesis I (from ADP-D-Glucose) | 3.45E-03 | PD |
| superpathway of L-serine and glycine biosynthesis I | 3.44E-03 | PD |
| phosphatidylglycerol biosynthesis I (plastidic) | 3.43E-03 | Healthy |
| phosphatidylglycerol biosynthesis II (non-plastidic) | 3.43E-03 | Healthy |
| pyridoxal 5'-phosphate biosynthesis I | 3.25E-03 | Healthy |
| L-arginine biosynthesis II (acetyl cycle) | 3.19E-03 | Healthy |
| L-isoleucine biosynthesis IV | 3.17E-03 | PD |
| GDP-mannose biosynthesis | 3.10E-03 | PD |
| L-methionine biosynthesis III | 3.06E-03 | PD |
| L-lysine biosynthesis I | 3.06E-03 | Healthy |
| superpathway of &beta;-D-glucuronide and D-glucuronate degradation | 3.04E-03 | PD |
| L-lysine biosynthesis II | 2.95E-03 | PD |
| L-histidine degradation I | 2.93E-03 | PD |
| seleno-amino acid biosynthesis | 2.87E-03 | PD |
| L-rhamnose degradation I | 2.82E-03 | Healthy |
| flavin biosynthesis I (bacteria and plants) | 2.81E-03 | Healthy |
| superpathway of phospholipid biosynthesis I (bacteria) | 2.80E-03 | Healthy |
| superpathway of histidine, purine, and pyrimidine biosynthesis | 2.72E-03 | PD |
| D-fructuronate degradation | 2.59E-03 | PD |
| guanosine nucleotides degradation III | 2.57E-03 | PD |
| TCA cycle I (prokaryotic) | 2.51E-03 | Healthy |
| superpathway of L-lysine, L-threonine and L-methionine biosynthesis I | 2.49E-03 | PD |
| TCA cycle V (2-oxoglutarate:ferredoxin oxidoreductase) | 2.45E-03 | Healthy |
| L-proline biosynthesis II (from arginine) | 2.36E-03 | PD |
| superpathway of N-acetylglucosamine, N-acetylmannosamine and N-acetylneuraminate degradation | 2.30E-03 | PD |
| formaldehyde assimilation III (dihydroxyacetone cycle) | 2.26E-03 | Healthy |
| 4-deoxy-L-threo-hex-4-enopyranuronate degradation | 2.25E-03 | PD |
| superpathway of hexuronide and hexuronate degradation | 2.24E-03 | PD |
| L-ornithine biosynthesis | 2.23E-03 | Healthy |
| adenosine nucleotides degradation II | 2.23E-03 | PD |
| putrescine biosynthesis IV | 2.18E-03 | PD |
| superpathway of L-aspartate and L-asparagine biosynthesis | 2.13E-03 | PD |
| anaerobic energy metabolism (invertebrates, cytosol) | 2.11E-03 | PD |
| CMP-3-deoxy-D-manno-octulosonate biosynthesis I | 2.11E-03 | Healthy |
| pantothenate and coenzyme A biosynthesis III | 2.10E-03 | PD |
| methylerythritol phosphate pathway II | 2.09E-03 | PD |
| inosine-5'-phosphate biosynthesis III | 2.07E-03 | PD |
| D-galacturonate degradation I | 2.06E-03 | PD |
| aspartate superpathway | 2.01E-03 | PD |
| TCA cycle II (plants and fungi) | 1.97E-03 | Healthy |
| O-antigen building blocks biosynthesis (E. coli) | 1.93E-03 | PD |
| gluconeogenesis I | 1.85E-03 | Healthy |
| 6-hydroxymethyl-dihydropterin diphosphate biosynthesis I | 1.80E-03 | Healthy |
| ppGpp biosynthesis | 1.72E-03 | Healthy |
| superpathway of purine nucleotide salvage | 1.71E-03 | Healthy |
| isoprene biosynthesis I | 1.68E-03 | PD |
| pyrimidine deoxyribonucleotides biosynthesis from CTP | 1.67E-03 | Healthy |
| superpathway of hexitol degradation (bacteria) | 1.66E-03 | PD |
| UDP-N-acetyl-D-glucosamine biosynthesis I | 1.58E-03 | PD |
| L-ornithine de novo biosynthesis | 1.55E-03 | Healthy |
| glycogen degradation II (eukaryotic) | 1.53E-03 | PD |
| glutaryl-CoA degradation | 1.53E-03 | PD |
| superpathway of purine deoxyribonucleosides degradation | 1.51E-03 | Healthy |
| stearate biosynthesis II (bacteria and plants) | 1.50E-03 | Healthy |
| petroselinate biosynthesis | 1.50E-03 | Healthy |
| mixed acid fermentation | 1.47E-03 | PD |
| C4 photosynthetic carbon assimilation cycle, PEPCK type | 1.42E-03 | PD |
| mannan degradation | 1.41E-03 | PD |
| gluconeogenesis III | 1.40E-03 | PD |
| superpathway of polyamine biosynthesis I | 1.39E-03 | PD |
| pyrimidine deoxyribonucleotides de novo biosynthesis IV | 1.36E-03 | Healthy |
| L-arginine biosynthesis III (via N-acetyl-L-citrulline) | 1.33E-03 | PD |
| 6-hydroxymethyl-dihydropterin diphosphate biosynthesis III (Chlamydia) | 1.24E-03 | Healthy |
| TCA cycle VI (obligate autotrophs) | 1.22E-03 | PD |
| pentose phosphate pathway | 1.17E-03 | PD |
| myo-, chiro- and scillo-inositol degradation | 1.12E-03 | PD |
| purine nucleotides degradation II (aerobic) | 1.05E-03 | PD |
| acetyl-CoA fermentation to butanoate II | 1.04E-03 | PD |
| superpathway of glucose and xylose degradation | 1.02E-03 | PD |
| incomplete reductive TCA cycle | 9.85E-04 | PD |
| superpathway of N-acetylneuraminate degradation | 9.79E-04 | PD |
| L-histidine degradation III | 9.62E-04 | PD |
| superpathway of L-methionine biosynthesis (by sulfhydrylation) | 9.37E-04 | PD |
| sulfate reduction I (assimilatory) | 9.23E-04 | Healthy |
| superpathway of arginine and polyamine biosynthesis | 9.21E-04 | PD |
| L-isoleucine biosynthesis II | 9.02E-04 | Healthy |
| superpathway of L-phenylalanine biosynthesis | 8.90E-04 | PD |
| superpathway of geranylgeranyl diphosphate biosynthesis II (via MEP) | 8.89E-04 | PD |
| hexitol fermentation to lactate, formate, ethanol and acetate | 8.82E-04 | PD |
| superpathway of sulfate assimilation and cysteine biosynthesis | 8.29E-04 | PD |
| superpathway of glycolysis and Entner-Doudoroff | 7.78E-04 | PD |
| glycerol degradation to butanol | 7.60E-04 | PD |
| L-glutamate and L-glutamine biosynthesis | 7.08E-04 | Healthy |
| superpathway of pyrimidine deoxyribonucleosides degradation | 7.07E-04 | PD |
| acetylene degradation | 7.03E-04 | PD |
| superpathway of L-tyrosine biosynthesis | 6.67E-04 | PD |
| guanosine nucleotides degradation II | 6.43E-04 | PD |
| peptidoglycan biosynthesis IV (Enterococcus faecium) | 6.29E-04 | Healthy |
| Bifidobacterium shunt | 6.22E-04 | PD |
| anhydromuropeptides recycling | 6.22E-04 | PD |
| superpathway of tetrahydrofolate biosynthesis and salvage | 6.02E-04 | PD |
| superpathway of L-tryptophan biosynthesis | 5.92E-04 | PD |
| lactose and galactose degradation I | 5.86E-04 | PD |
| fatty acid elongation -- saturated | 5.80E-04 | PD |
| fatty acid &beta;-oxidation I | 5.79E-04 | PD |
| pyruvate fermentation to acetone | 5.69E-04 | PD |
| oleate biosynthesis IV (anaerobic) | 5.46E-04 | PD |
| tetrapyrrole biosynthesis II (from glycine) | 5.35E-04 | Healthy |
| mycolate biosynthesis | 5.24E-04 | PD |
| phosphatidylcholine acyl editing | 5.17E-04 | Healthy |
| (5Z)-dodec-5-enoate biosynthesis | 5.16E-04 | PD |
| palmitoleate biosynthesis I (from (5Z)-dodec-5-enoate) | 5.14E-04 | PD |
| palmitate biosynthesis II (bacteria and plants) | 5.11E-04 | PD |
| superpathway of thiamin diphosphate biosynthesis I | 5.09E-04 | PD |
| fatty acid &beta;-oxidation II (peroxisome) | 5.03E-04 | PD |
| L-citrulline biosynthesis | 5.00E-04 | PD |
| superpathway of sulfur oxidation (Acidianus ambivalens) | 4.99E-04 | PD |
| superpathway of guanosine nucleotides degradation (plants) | 4.75E-04 | PD |
| fucose degradation | 4.72E-04 | PD |
| superpathway of fatty acid biosynthesis initiation (E. coli) | 4.70E-04 | PD |
| L-glutamine biosynthesis III | 4.66E-04 | PD |
| superpathway of tetrahydrofolate biosynthesis | 4.63E-04 | PD |
| NAD salvage pathway I | 4.55E-04 | PD |
| octanoyl-[acyl-carrier protein] biosynthesis (mitochondria, yeast) | 4.55E-04 | PD |
| superpathway of fermentation (Chlamydomonas reinhardtii) | 4.18E-04 | PD |
| urea cycle | 4.15E-04 | Healthy |
| superpathway of mycolate biosynthesis | 4.15E-04 | PD |
| purine nucleobases degradation I (anaerobic) | 4.07E-04 | PD |
| Rubisco shunt | 4.03E-04 | Healthy |
| superpathway of glycerol degradation to 1,3-propanediol | 4.01E-04 | PD |
| biotin biosynthesis I | 4.01E-04 | PD |
| superpathway of L-alanine biosynthesis | 3.98E-04 | PD |
| L-1,2-propanediol degradation | 3.82E-04 | Healthy |
| heme biosynthesis II (anaerobic) | 3.75E-04 | PD |
| taxadiene biosynthesis (engineered) | 3.71E-04 | PD |
| 8-amino-7-oxononanoate biosynthesis I | 3.55E-04 | PD |
| superpathway of Clostridium acetobutylicum acidogenic fermentation | 3.50E-04 | PD |
| tRNA processing | 3.47E-04 | PD |
| C4 photosynthetic carbon assimilation cycle, NADP-ME type | 3.46E-04 | PD |
| unsaturated, even numbered fatty acid &beta;-oxidation | 3.36E-04 | Healthy |
| superpathway of glycolysis, pyruvate dehydrogenase, TCA, and glyoxylate bypass | 3.25E-04 | PD |
| lipid IVA biosynthesis | 3.23E-04 | PD |
| superpathway of unsaturated fatty acids biosynthesis (E. coli) | 3.22E-04 | Healthy |
| GABA shunt | 3.20E-04 | PD |
| superpathway of ornithine degradation | 3.18E-04 | Healthy |
| colanic acid building blocks biosynthesis | 3.13E-04 | PD |
| glyoxylate cycle | 3.06E-04 | Healthy |
| superpathway of GDP-mannose-derived O-antigen building blocks biosynthesis | 3.06E-04 | Healthy |
| superpathway of thiamin diphosphate biosynthesis II | 2.99E-04 | PD |
| L-glutamate degradation V (via hydroxyglutarate) | 2.98E-04 | PD |
| superpathway of fucose and rhamnose degradation | 2.96E-04 | PD |
| superpathway of menaquinol-11 biosynthesis | 2.86E-04 | PD |
| superpathway of menaquinol-12 biosynthesis | 2.86E-04 | PD |
| superpathway of menaquinol-13 biosynthesis | 2.86E-04 | PD |
| pyruvate fermentation to butanoate | 2.85E-04 | PD |
| NAD/NADH phosphorylation and dephosphorylation | 2.82E-04 | PD |
| superpathway of glycol metabolism and degradation | 2.66E-04 | Healthy |
| NAD salvage pathway II | 2.63E-04 | PD |
| phytate degradation I | 2.59E-04 | PD |
| heme biosynthesis I (aerobic) | 2.59E-04 | Healthy |
| glycogen degradation I (bacterial) | 2.57E-04 | PD |
| nitrate reduction V (assimilatory) | 2.54E-04 | Healthy |
| enterobactin biosynthesis | 2.47E-04 | PD |
| 4-aminobutanoate degradation V | 2.42E-04 | PD |
| superpathway of glyoxylate bypass and TCA | 2.41E-04 | PD |
| TCA cycle IV (2-oxoglutarate decarboxylase) | 2.37E-04 | Healthy |
| formaldehyde assimilation II (RuMP Cycle) | 2.31E-04 | Healthy |
| superpathway of sulfur amino acid biosynthesis (Saccharomyces cerevisiae) | 2.24E-04 | PD |
| superpathway of menaquinol-7 biosynthesis | 2.16E-04 | PD |
| sucrose degradation IV (sucrose phosphorylase) | 2.16E-04 | PD |
| pyruvate fermentation to propanoate I | 2.14E-04 | PD |
| phytol degradation | 2.12E-04 | Healthy |
| superpathway of menaquinol-8 biosynthesis I | 2.09E-04 | PD |
| biotin biosynthesis II | 2.06E-04 | PD |
| superpathay of heme biosynthesis from glutamate | 2.06E-04 | PD |
| superpathway of glyoxylate cycle and fatty acid degradation | 2.01E-04 | Healthy |
| all-trans-farnesol biosynthesis | 1.87E-04 | PD |
| TCA cycle VII (acetate-producers) | 1.87E-04 | PD |
| D-glucarate degradation I | 1.86E-04 | Healthy |
| aerobic respiration I (cytochrome c) | 1.84E-04 | PD |
| sucrose degradation II (sucrose synthase) | 1.76E-04 | PD |
| polyisoprenoid biosynthesis (E. coli) | 1.74E-04 | PD |
| superpathway of anaerobic sucrose degradation | 1.72E-04 | PD |
| superpathway of demethylmenaquinol-8 biosynthesis | 1.68E-04 | PD |
| mannitol cycle | 1.65E-04 | PD |
| superpathway of pyrimidine ribonucleosides degradation | 1.63E-04 | PD |
| thiazole biosynthesis I (E. coli) | 1.59E-04 | PD |
| creatinine degradation I | 1.56E-04 | PD |
| TCA cycle VIII (helicobacter) | 1.48E-04 | PD |
| D-galactarate degradation I | 1.48E-04 | Healthy |
| superpathway of D-glucarate and D-galactarate degradation | 1.48E-04 | Healthy |
| L-phenylalanine degradation IV (mammalian, via side chain) | 1.47E-04 | PD |
| glucose and glucose-1-phosphate degradation | 1.44E-04 | PD |
| superpathway of fatty acids biosynthesis (E. coli) | 1.43E-04 | PD |
| superpathway of menaquinol-9 biosynthesis | 1.43E-04 | PD |
| superpathway of menaquinol-6 biosynthesis I | 1.43E-04 | PD |
| superpathway of menaquinol-10 biosynthesis | 1.43E-04 | PD |
| C4 photosynthetic carbon assimilation cycle, NAD-ME type | 1.36E-04 | PD |
| 1,4-dihydroxy-2-naphthoate biosynthesis II (plants) | 1.34E-04 | PD |
| 1,4-dihydroxy-2-naphthoate biosynthesis I | 1.34E-04 | PD |
| superpathway of UDP-glucose-derived O-antigen building blocks biosynthesis | 1.31E-04 | PD |
| superpathway of phylloquinol biosynthesis | 1.29E-04 | PD |
| fatty acid beta-oxidation V (unsaturated, odd number, di-isomerase-dependent) | 1.21E-04 | Healthy |
| pyridoxal 5'-phosphate salvage II (plants) | 1.19E-04 | PD |
| superpathway of demethylmenaquinol-6 biosynthesis I | 1.17E-04 | PD |
| superpathway of demethylmenaquinol-9 biosynthesis | 1.17E-04 | PD |
| ketogluconate metabolism | 1.14E-04 | Healthy |
| dTDP-N-acetylthomosamine biosynthesis | 1.05E-04 | PD |
| superpathway of heme biosynthesis from uroporphyrinogen-III | 1.04E-04 | PD |
| superpathway of polyamine biosynthesis II | 1.04E-04 | PD |
| superpathway of acetyl-CoA biosynthesis | 1.03E-04 | PD |
| thiazole biosynthesis II (Bacillus) | 1.00E-04 | PD |
| &gamma;-glutamyl cycle | 9.64E-05 | PD |
| methanogenesis from H2 and CO2 | 9.36E-05 | PD |
| 1,4-dihydroxy-6-naphthoate biosynthesis II | 9.13E-05 | PD |
| L-glutamate degradation IV | 8.51E-05 | PD |
| 4-hydroxybenzoate biosynthesis V | 8.38E-05 | Healthy |
| heterolactic fermentation | 7.22E-05 | PD |
| nitrate reduction VI (assimilatory) | 6.81E-05 | PD |
| superpathway of cytosolic glycolysis (plants), pyruvate dehydrogenase and TCA cycle | 6.63E-05 | PD |
| flavin biosynthesis II (archaea) | 6.22E-05 | Healthy |
| L-arginine degradation II (AST pathway) | 5.82E-05 | PD |
| 3-phenylpropanoate and 3-(3-hydroxyphenyl)propanoate degradation | 5.57E-05 | PD |
| ureide biosynthesis | 5.27E-05 | PD |
| reductive TCA cycle I | 4.59E-05 | PD |
| 2-methylcitrate cycle I | 4.57E-05 | PD |
| superpathway of heme biosynthesis from glycine | 4.55E-05 | PD |
| superpathway of ubiquinol-6 biosynthesis (eukaryotic) | 4.32E-05 | Healthy |
| NAD/NADP-NADH/NADPH mitochondrial interconversion (yeast) | 4.15E-05 | PD |
| TCA cycle III (animals) | 3.89E-05 | PD |
| 2-methylcitrate cycle II | 3.89E-05 | PD |
| factor 420 biosynthesis | 3.79E-05 | Healthy |
| protocatechuate degradation II (ortho-cleavage pathway) | 3.59E-05 | PD |
| trehalose degradation V | 3.54E-05 | PD |
| arginine, ornithine and proline interconversion | 3.31E-05 | PD |
| ubiquinol-9 biosynthesis (eukaryotic) | 3.22E-05 | Healthy |
| ubiquinol-7 biosynthesis (eukaryotic) | 3.22E-05 | Healthy |
| superpathway of L-arginine, putrescine, and 4-aminobutanoate degradation | 3.18E-05 | PD |
| superpathway of L-arginine and L-ornithine degradation | 3.18E-05 | PD |
| mannosylglycerate biosynthesis I | 2.85E-05 | PD |
| 3-phenylpropanoate and 3-(3-hydroxyphenyl)propanoate degradation to 2-oxopent-4-enoate | 2.72E-05 | PD |
| cinnamate and 3-hydroxycinnamate degradation to 2-oxopent-4-enoate | 2.72E-05 | PD |
| superpathway of (Kdo)2-lipid A biosynthesis | 2.65E-05 | PD |
| superpathway of menaquinol-8 biosynthesis II | 2.57E-05 | PD |
| 7-(3-amino-3-carboxypropyl)-wyosine biosynthesis | 2.35E-05 | PD |
| phospholipid remodeling (phosphatidylethanolamine, yeast) | 2.30E-05 | PD |
| ubiquinol-7 biosynthesis (prokaryotic) | 2.29E-05 | PD |
| ubiquinol-9 biosynthesis (prokaryotic) | 2.29E-05 | PD |
| ubiquinol-10 biosynthesis (prokaryotic) | 2.29E-05 | PD |
| ubiquinol-8 biosynthesis (prokaryotic) | 2.29E-05 | PD |
| 4-hydroxyphenylacetate degradation | 2.28E-05 | PD |
| allantoin degradation to glyoxylate III | 2.16E-05 | PD |
| ADP-L-glycero-&beta;-D-manno-heptose biosynthesis | 2.14E-05 | PD |
| superpathway of ubiquinol-8 biosynthesis (prokaryotic) | 2.02E-05 | PD |
| superpathway of L-threonine metabolism | 1.97E-05 | PD |
| enterobacterial common antigen biosynthesis | 1.97E-05 | PD |
| chorismate biosynthesis II (archaea) | 1.97E-05 | PD |
| polymyxin resistance | 1.95E-05 | PD |
| fatty acid salvage | 1.94E-05 | PD |
| aerobic respiration II (cytochrome c) (yeast) | 1.93E-05 | PD |
| molybdenum cofactor biosynthesis | 1.91E-05 | PD |
| octane oxidation | 1.90E-05 | PD |
| superpathway of geranylgeranyldiphosphate biosynthesis I (via mevalonate) | 1.86E-05 | PD |
| catechol degradation I (meta-cleavage pathway) | 1.81E-05 | PD |
| methylphosphonate degradation I | 1.71E-05 | PD |
| serotonin degradation | 1.64E-05 | Healthy |
| catechol degradation to &beta;-ketoadipate | 1.61E-05 | Healthy |
| mevalonate pathway I | 1.52E-05 | PD |
| superpathway of fatty acid biosynthesis I (E. coli) | 1.52E-05 | PD |
| allantoin degradation IV (anaerobic) | 1.49E-05 | PD |
| starch degradation III | 1.38E-05 | PD |
| ubiquinol-6 biosynthesis from 4-hydroxybenzoate (eukaryotic) | 1.38E-05 | PD |
| superpathway of (R,R)-butanediol biosynthesis | 1.30E-05 | PD |
| aromatic biogenic amine degradation (bacteria) | 1.26E-05 | Healthy |
| superpathway of allantoin degradation in yeast | 1.25E-05 | PD |
| L-tryptophan degradation X (mammalian, via tryptamine) | 1.22E-05 | Healthy |
| superpathway of methylglyoxal degradation | 1.20E-05 | PD |
| formaldehyde oxidation I | 1.17E-05 | PD |
| catechol degradation III (ortho-cleavage pathway) | 1.12E-05 | Healthy |
| aromatic compounds degradation via &beta;-ketoadipate | 1.12E-05 | Healthy |
| isoprene biosynthesis II (engineered) | 1.08E-05 | PD |
| sulfoglycolysis | 9.43E-06 | Healthy |
| allantoin degradation to glyoxylate II | 9.01E-06 | PD |
| superpathway of allantoin degradation in plants | 9.01E-06 | PD |
| superpathway of chorismate metabolism | 8.68E-06 | PD |
| L-glutamate degradation VIII (to propanoate) | 8.21E-06 | PD |
| teichoic acid (poly-glycerol) biosynthesis | 8.03E-06 | Healthy |
| L-tryptophan degradation XI (mammalian, via kynurenine) | 7.63E-06 | Healthy |
| superpathway of L-citrulline metabolism | 7.04E-06 | PD |
| superpathway of lipopolysaccharide biosynthesis | 6.64E-06 | Healthy |
| superpathway of salicylate degradation | 6.35E-06 | PD |
| phenylacetate degradation I (aerobic) | 5.60E-06 | PD |
| superpathway of phenylethylamine degradation | 5.35E-06 | PD |
| purine nucleotides degradation I (plants) | 4.51E-06 | PD |
| adenosine nucleotides degradation I | 3.93E-06 | PD |
| methylphosphonate degradation II | 3.93E-06 | PD |
| isopropanol biosynthesis | 3.65E-06 | PD |
| toluene degradation III (aerobic) (via p-cresol) | 3.50E-06 | PD |
| superpathway of 2,3-butanediol biosynthesis | 3.43E-06 | PD |
| 1,4-dihydroxy-6-naphthoate biosynthesis I | 3.20E-06 | PD |
| chitin degradation to ethanol | 2.93E-06 | PD |
| palmitate biosynthesis I (animals and fungi) | 2.41E-06 | PD |
| 4-hydroxybenzoate biosynthesis I (eukaryotes) | 2.16E-06 | PD |
| myo-inositol degradation I | 2.09E-06 | PD |
| xylose degradation IV | 2.01E-06 | PD |
| superpathway of 4-hydroxybenzoate biosynthesis (yeast) | 1.94E-06 | PD |
| 4-methylcatechol degradation (ortho cleavage) | 1.94E-06 | Healthy |
| aerobactin biosynthesis | 1.87E-06 | PD |
| phosphatidate metabolism, as a signaling molecule | 1.69E-06 | PD |
| coenzyme M biosynthesis I | 1.32E-06 | Healthy |
| stearate biosynthesis III (fungi) | 9.33E-07 | PD |
| mevalonate pathway II (archaea) | 7.94E-07 | PD |
| chlorosalicylate degradation | 7.74E-07 | PD |
| sitosterol degradation to androstenedione | 6.38E-07 | PD |
| L-lysine fermentation to acetate and butanoate | 4.58E-07 | PD |
| methyl ketone biosynthesis | 4.31E-07 | PD |
| fatty acid &alpha;-oxidation III | 3.67E-07 | PD |
| L-methionine salvage cycle III | 3.33E-07 | PD |
| superpathway of sulfide oxidation (phototrophic sulfur bacteria) | 2.43E-07 | PD |
| S-methyl-5-thio-&alpha;-D-ribose 1-phosphate degradation | 2.06E-07 | PD |
| photosynthesis light reactions | 1.67E-07 | PD |
| CMP-N-acetylneuraminate biosynthesis I (eukaryotes) | 1.11E-07 | PD |
